# Supplementary material
Source: PubMed Central journal article supplement (PMC10192911)
Supplement: mmc1.pdf [file mmc1.pdf]

iScience, Volume 26

## **Supplemental information**

### **Randomized clinical trials of COVID-19 vaccines: Do adenovirus-vector vaccines have beneficial non-specific effects?**

**Christine S. Benn, Frederik Scholtz-Buchholzer, Sebastian Nielsen, Mihai G. Netea, and Peter Aaby**

## Randomized clinical trials of COVID-19 vaccines:

### do adenovirus-vector vaccines have beneficial non-specific effects?

Christine S. Benn, DMSc<sup>1,2,3</sup>, Frederik Scholtz-Buchholzer, MD, PhD<sup>1,2</sup>, Sebastian Nielsen, MSc, PhD<sup>1,2</sup>, Mihai G. Netea, MD, PhD<sup>4,5</sup>, Peter Aaby, DMSc<sup>1,2</sup>

<sup>1</sup>Bandim Health Project, Indepth Network, Apartado 861, Bissau, Guinea-Bissau

<sup>2</sup>OPEN, Odense Patient data Explorative Network, Institute of Clinical Research; Odense University Hospital/ University of Southern Denmark, Denmark

<sup>3</sup>Danish Institute of Advanced Science, University of Southern Denmark, Denmark

<sup>4</sup>Department of Internal Medicine and Radboud Center for Infectious Diseases, Radboud University Medical Center, Nijmegen, Netherlands

<sup>5</sup>Department of Immunology and Metabolism, Life and Medical Science Institute, University of Bonn, Bonn, Germany

**Lead contact:** Christine S. Benn, [cbenn@health.sdu.dk](mailto:cbenn@health.sdu.dk)

**Table S1. Background information about included RCTs, Related to tables 1 and 2.**

|                                     | <b>Pfizer</b><br><sup>1</sup>                        | <b>Moderna</b><br><sup>2</sup> | <b>CVnCoV</b><br><sup>3</sup>                                        | <b>AZ<br/>US/Chile/Peru</b> <sup>4</sup> | <b>AZ South Africa</b><br><sup>5,6</sup> | <b>AZ UK/Brazil</b><br><sup>7</sup>          | <b>Johnson&amp;Johnson</b> <sup>8</sup>                            | <b>Gam-COVID-<br/>Vac</b><br><sup>9</sup> | <b>Ad5-nCoV</b><br><sup>10</sup>           |
|-------------------------------------|------------------------------------------------------|--------------------------------|----------------------------------------------------------------------|------------------------------------------|------------------------------------------|----------------------------------------------|--------------------------------------------------------------------|-------------------------------------------|--------------------------------------------|
| <b>Trial registration number</b>    | NCT04368728                                          | NCT04470427                    | NCT04652102                                                          | NCT04516746                              | NCT04444674                              | ISRCTN89951424<br>NCT04324606<br>NCT04400838 | NCT04505722                                                        | NCT04530396                               | NCT04526990                                |
| <b>N</b>                            | 44,165                                               | 30,415                         | 39,680                                                               | 32,451                                   | 2021                                     | 22119                                        | 39,321                                                             | 21,977                                    | 36,717                                     |
| <b>Vaccine</b>                      | mRNA                                                 | mRNA                           | mRNA                                                                 | Chimpanzee Adenovirus Y25                | Chimpanzee Adenovirus Y25                | Chimpanzee Adenovirus Y25                    | Human Adenovirus 26                                                | Human Adenovirus 26 and 5                 | Human Adenovirus 5                         |
| <b>No of doses</b>                  | 2                                                    | 2                              | 2                                                                    | 2                                        | 2                                        | 2                                            | 1                                                                  | 2                                         | 1                                          |
| <b>Phase</b>                        | 2/3                                                  | 3                              | 2b/3                                                                 | 3                                        | 1/2                                      | 1/2/3                                        | 3                                                                  | 3                                         | 3                                          |
| <b>Randomization ratio</b>          | 1:1                                                  | 1:1                            | 1:1                                                                  | 2:1                                      | 1:1                                      | 1:1                                          | 1:1                                                                | 3:1                                       | 1:1                                        |
| <b>Intervention</b>                 | BNT162b2                                             | mRNA-1273                      | CVnCoV                                                               | AZD1222                                  | AZD1222                                  | AZD1222                                      | Ad26.COV2.S                                                        | Gam-COVID-Vac                             | Ad5-nCoV                                   |
| <b>Control group</b>                | Saline                                               | Placebo <sup>b</sup>           | Saline                                                               | Saline                                   | Saline                                   | Control vaccine (MenACWY)                    | Saline                                                             | Vaccine buffer                            | Vaccine buffer                             |
| <b>Vaccine efficacy<sup>a</sup></b> | 91% (89-93%)                                         | 93% (91-95%)                   | 48% (31-61%)                                                         | 74% (65-81%)                             | 22% (-50-60%)                            | 67% (57-74%)                                 | 67% (59-73%)                                                       | 92% (86-95%)                              | 58% (40-70%)                               |
| <b>Age enrolled (years)</b>         | 16+                                                  | 18+                            | 18+                                                                  | 18+                                      | 18-65                                    | 18+                                          | 18+                                                                | 18+                                       | 18+                                        |
| <b>Male %</b>                       | 51                                                   | 53                             | 55                                                                   | 56                                       | 57                                       | 42                                           | 55                                                                 | 61                                        | 71                                         |
| <b>Age (mean or median (range))</b> | 51 (16-91)                                           | 51 (18-95)                     | 43 (IQR 31-54)                                                       | 50 (18-100)                              | 30 (18-64)                               | 83%<55years                                  | 52 (18-100)                                                        | 45 (SD 12)                                | 38 (18-94)                                 |
| <b>Geographical location</b>        | US, Argentina, Brazil, South Africa, Germany, Turkey | US                             | Belgium, Germany, Netherlands, Spain, Argentina, Colombia, Dominican | US, Chile, Peru                          | South Africa                             | UK, Brazil                                   | US, Argentina, Brazil, Chile, Colombia, Mexico, Peru, South Africa | Russia                                    | Argentina, Chile, Mexico, Pakistan, Russia |

|                                               |                                                                 |                                                        |                                                                 |                                                             |                                                      |                                                      |                                                             |                                                     |                                                            |
|-----------------------------------------------|-----------------------------------------------------------------|--------------------------------------------------------|-----------------------------------------------------------------|-------------------------------------------------------------|------------------------------------------------------|------------------------------------------------------|-------------------------------------------------------------|-----------------------------------------------------|------------------------------------------------------------|
|                                               |                                                                 |                                                        | Republic,<br>Mexico,<br>Panama, Peru                            |                                                             |                                                      |                                                      |                                                             |                                                     |                                                            |
| <b>Proportion recruited in the US</b>         | 76%                                                             | 100%                                                   | 0%                                                              | 89%                                                         | 0%                                                   | 0%                                                   | 44%                                                         | 0%                                                  | 0%                                                         |
| <b>Enrolment period and data cut-off</b>      | July 27, to Oct 29, 2020<br>Data cut-off March 13, 2021         | July 27 to Oct 23, 2020<br>Data cut-off March 26, 2021 | Dec 11, 2020 to April 12, 2021<br>Data cut-off June 18, 2021    | Aug 28, 2020, to Jan 15, 2021<br>Data cut-off March 5, 2021 | June 24 and Nov 9, 2020                              | April 23 and Dec 6, 2020<br>Data cut-off Dec 6, 2020 | Sept 21, 2020, to Jan 22, 2021<br>Data cut-off Jan 22, 2021 | Sept 7 to Nov 24, 2020<br>Data cut-off Nov 24, 2020 | Sept 22, 2020 to Jan 15, 2021<br>Data cut-off Jan 15, 2021 |
| <b>Duration of follow-up</b>                  | Mean follow-up from 7 days after 2 <sup>nd</sup> dose: 108 days | Median follow-up from 1 <sup>st</sup> dose: 5.3 months | Mean follow-up from 15 days after 2 <sup>nd</sup> dose: 48 days | Median follow-up from 2 <sup>nd</sup> dose: 61 days         | Median follow-up from 1 <sup>st</sup> dose: 156 days | Mean follow-up from 1 <sup>st</sup> dose: 4.2 months | Median follow-up: 58 days                                   | Median follow-up from 1 <sup>st</sup> dose: 48 days | Median follow-up from 28 days post-vaccination: 45 days    |
| <b>Follow-up days in control group</b>        | 2,937,414                                                       | 2,441,082                                              | N/A                                                             | 960,488                                                     | 157,560                                              | 1,384,427                                            | 1,269,504                                                   | 260,880                                             | N/A                                                        |
| <b>COVID-19 infection in control group</b>    | 4.1% (850/20713)                                                | 5.3% (744/14164)                                       | 1.2% (145/12211)                                                | 1.5% (130/8550)                                             | 3.2% (23/717)                                        | 2.9% (248/8581)                                      | 1.8% (348/19544)                                            | 1.3% (62/4902)                                      | 1.5% (211/14586)                                           |
| <b>Cardiovascular deaths: % of all deaths</b> | 52% (15/29)                                                     | 38% (12/32)                                            | No information                                                  | 14% (2/14)                                                  | 0%                                                   | 0%                                                   | 11% (2/19)                                                  | 25% (1/4)                                           | No information                                             |
| <b>COVID-19 death: % of all deaths</b>        | 10% (3/29)                                                      | 13% (4/32)                                             | No information                                                  | 14% (2/14)                                                  | 0%                                                   | 20% (1/5)                                            | 26% (5/19)                                                  | 50% (2/4)                                           | No information                                             |

a. The calculations of vaccine efficacy differ with respect to the number of days after vaccination that observation is started

b. no information on preparation

**Table S2. The rate of causes of death per 10,000 person-years (pyrs) in the control groups by type of vaccine, Related to Tables 1 and 2**

| Cause of death                           | Rate deaths per 10,000 pyrs<br>(number of deaths/pyrs) in the control group |                                        | Relative risk (95% CI)<br>mRNA vs Adenovirus-vector vaccine in the control group |
|------------------------------------------|-----------------------------------------------------------------------------|----------------------------------------|----------------------------------------------------------------------------------|
|                                          | mRNA RCTs:<br>14,725.5 pyrs                                                 | Adenovirus-vector RCTs:<br>11,041 pyrs |                                                                                  |
| <b>COVID-19 deaths</b>                   | 3.4 (5/14726)                                                               | 7.2 (8/11041)                          | 0.47 (0.15-1.43)                                                                 |
| <b>Accidents</b>                         | 1.4 (2/14726)                                                               | 5.4 (6/11041)                          | 0.25 (0.05-1.24)                                                                 |
| <b>Non-accident, non-COVID-19 deaths</b> | 15.6 (23/14726)                                                             | 14.5 (16/11041)                        | 1.08 (0.57-2.04)                                                                 |
| <b>Overall mortality</b>                 | 20.4 (30/14726)                                                             | 27.2 (30/11041)                        | 0.75 (0.45-1.24)                                                                 |

## References

1. Thomas, S.J., Moreira, E.D., Jr., Kitchin, N., Absalon, J., Gurtman, A., Lockhart, S., Perez, J.L., Perez Marc, G., Polack, F.P., Zerbini, C., et al. (2021). Safety and Efficacy of the BNT162b2 mRNA Covid-19 Vaccine through 6 Months. *N Engl J Med* 385, 1761-1773. 10.1056/NEJMoa2110345.
2. El Sahly, H.M., Baden, L.R., Essink, B., Doblecki-Lewis, S., Martin, J.M., Anderson, E.J., Campbell, T.B., Clark, J., Jackson, L.A., Fichtenbaum, C.J., et al. (2021). Efficacy of the mRNA-1273 SARS-CoV-2 Vaccine at Completion of Blinded Phase. *N Engl J Med* 385, 1774-1785. 10.1056/NEJMoa2113017.
3. Kremsner, P.G., Ahuad Guerrero, R.A., Arana-Arri, E., Aroca Martinez, G.J., Bonten, M., Chandler, R., Corral, G., De Block, E.J.L., Ecker, L., Gabor, J.J., et al. (2022). Efficacy and safety of the CVnCoV SARS-CoV-2 mRNA vaccine candidate in ten countries in Europe and Latin America (HERALD): a randomised, observer-blinded, placebo-controlled, phase 2b/3 trial. *Lancet Infect Dis* 22, 329-340. 10.1016/S1473-3099(21)00677-0.
4. Falsey, A.R., Sobieszczyk, M.E., Hirsch, I., Sproule, S., Robb, M.L., Corey, L., Neuzil, K.M., Hahn, W., Hunt, J., Mulligan, M.J., et al. (2021). Phase 3 Safety and Efficacy of AZD1222 (ChAdOx1 nCoV-19) Covid-19 Vaccine. *N Engl J Med* 385, 2348-2360. 10.1056/NEJMoa2105290.
5. Madhi, S.A., Baillie, V., Cutland, C.L., Voysey, M., Koen, A.L., Fairlie, L., Padayachee, S.D., Dheda, K., Barnabas, S.L., Bhorat, Q.E., et al. (2021). Efficacy of the ChAdOx1 nCoV-19 Covid-19 Vaccine against the B.1.351 Variant. *N Engl J Med* 384, 1885-1898. 10.1056/NEJMoa2102214.
6. Madhi, S.A., Koen, A.L., Izu, A., Fairlie, L., Cutland, C.L., Baillie, V., Padayachee, S.D., Dheda, K., Barnabas, S.L., Bhorat, Q.E., et al. (2021). Safety and immunogenicity of the ChAdOx1 nCoV-19 (AZD1222) vaccine against SARS-CoV-2 in people living with and without HIV in South Africa: an interim analysis of a randomised, double-blind, placebo-controlled, phase 1B/2A trial. *Lancet HIV* 8, e568-e580. 10.1016/S2352-3018(21)00157-0.
7. Voysey, M., Costa Clemens, S.A., Madhi, S.A., Weckx, L.Y., Folegatti, P.M., Aley, P.K., Angus, B., Baillie, V.L., Barnabas, S.L., Bhorat, Q.E., et al. (2021). Single-dose administration and the influence of the timing of the booster dose on immunogenicity and efficacy of ChAdOx1 nCoV-19 (AZD1222) vaccine: a pooled analysis of four randomised trials. *Lancet* 397, 881-891. 10.1016/S0140-6736(21)00432-3.
8. Sadoff, J., Gray, G., Vandebosch, A., Cardenas, V., Shukarev, G., Grinsztejn, B., Goepfert, P.A., Truyers, C., Fennema, H., Spiessens, B., et al. (2021). Safety and Efficacy of Single-Dose Ad26.COV2.S Vaccine against Covid-19. *N Engl J Med* 384, 2187-2201. 10.1056/NEJMoa2101544.
9. Logunov, D.Y., Dolzhikova, I.V., Shcheblyakov, D.V., Tukhvatulin, A.I., Zubkova, O.V., Dzharullaeva, A.S., Kovyrshina, A.V., Lubenets, N.L., Grousova, D.M., Erokhova, A.S., et al. (2021). Safety and efficacy of an rAd26 and rAd5 vector-based heterologous prime-boost COVID-19 vaccine: an interim analysis of a randomised controlled phase 3 trial in Russia. *Lancet* 397, 671-681. 10.1016/S0140-6736(21)00234-8.
10. Halperin, S.A., Ye, L., MacKinnon-Cameron, D., Smith, B., Cahn, P.E., Ruiz-Palacios, G.M., Ikram, A., Lanas, F., Lourdes Guerrero, M., Munoz Navarro, S.R., et al. (2022). Final efficacy analysis, interim safety analysis, and immunogenicity of a single dose of recombinant novel coronavirus vaccine (adenovirus type 5 vector) in adults 18 years and older: an international, multicentre, randomised, double-blinded, placebo-controlled phase 3 trial. *Lancet* 399, 237-248. 10.1016/S0140-6736(21)02753-7.
